# Supplementary material for: Calcium hydride with aluminium for thermochemical energy storage applications
Source: Royal Society of Chemistry journal article supplement (doi:10.1039/d3se01122d), 2023-11-27
Supplement: d3se01122d1.pdf [file d3se01122d1.pdf]

## Supplementary information

### Calcium hydride with aluminium for thermochemical energy storage applications

Lucie Desage,<sup>a†</sup> Terry D. Humphries,<sup>a\*</sup> Mark Paskevicius,<sup>a</sup> Craig E. Buckley.<sup>a</sup>

<sup>a</sup> Physics and Astronomy, School of Electrical Engineering, Computing and Mathematical Sciences, Institute for Energy Transition, Curtin University, GPO Box U1987, Perth, WA 6845, Australia.

\* Corresponding author. E-mail address: [terry\\_humphries81@hotmail.com](mailto:terry_humphries81@hotmail.com) (T. D. Humphries).

† These authors contributed equally to this work

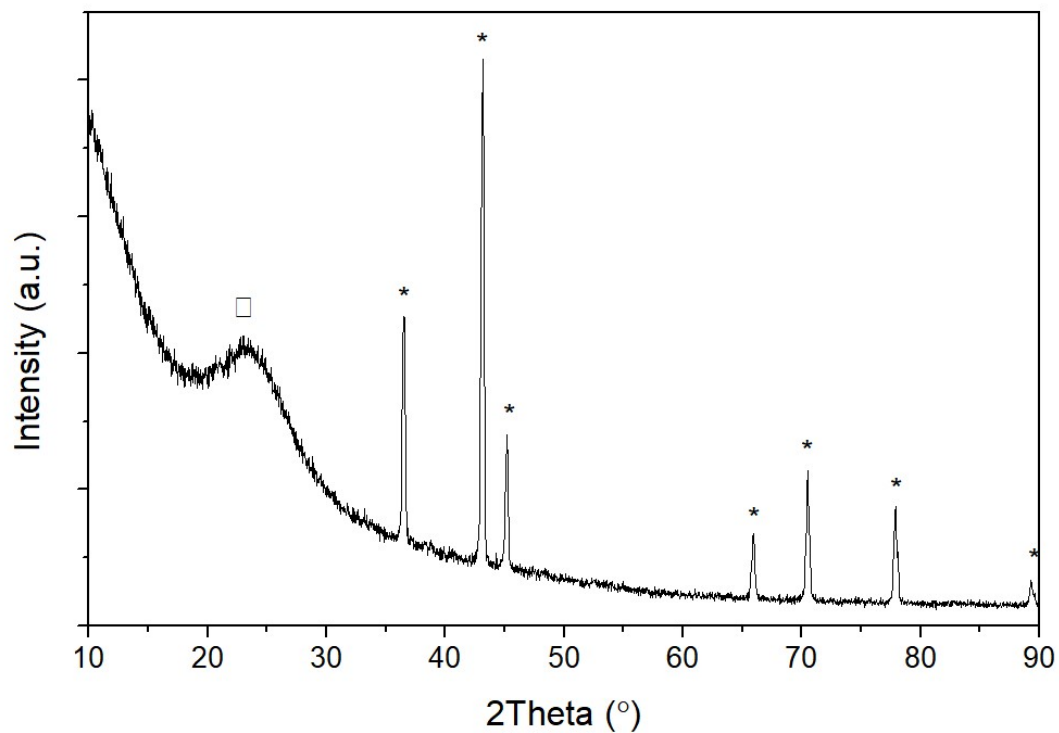

**Figure S1.** XRD pattern of  $\text{CaH}_2\text{-Al}_2$  after PCI analysis (> 5 cycles) left in the desorbed state.

Markers: \*  $\text{CaAl}_2$ ;  $\blacksquare$  Amorphous hump due to poly(methylmethacrylate) (PMMA) airtight dome used to prevent oxygen/moisture contamination during data collection.  $\lambda = 1.79 \text{ \AA}$ .
